# Supplementary material
Source: Royal Society of Chemistry journal article supplement (doi:10.1039/d6dt00598e)
Supplement: d6dt00598e1.pdf [file d6dt00598e1.pdf]

## Supporting Information

### **Mn<sup>2+</sup>-Intercalated Hydrated Vanadium Oxide with Tunable Spacing for High-Performance Zinc-Ion Batteries**

Yuling Tu<sup>a</sup>, Dejun Gong<sup>a</sup>, Lirong Jia<sup>a</sup>, Zeming Lu<sup>a</sup>, Jun Gao<sup>a</sup>, Hui Chai<sup>a\*</sup>, Yali Cao<sup>a</sup>, Xiaogang Zhang<sup>b</sup>, Naseem Iqbal<sup>c</sup>

<sup>a</sup>State Key Laboratory of Chemistry and Utilization of Carbon Based Energy Resources; Key Laboratory of Energy Materials Chemistry, Ministry of Education; Institute of Applied Chemistry, College of Chemistry, Xinjiang University, Urumqi, 830017, Xinjiang, PR China

<sup>b</sup>College of Material Science and Engineering, Nanjing University of Aeronautics and Astronautics, Yudao Street 29, Nanjing 210016, PR China

<sup>c</sup>US-Pakistan Centre for Advanced Studies in Energy, (USPCAS-E), National University of Sciences and Technology (NUST), H-12, Islamabad 44000, Pakistan

\*Corresponding author: Tel: +86 9918583083; Fax: +86 9918588883; E-mail: [huichmails@163.com](mailto:huichmails@163.com)

#### **Material characterization**

The crystalline structure of the synthesized material was examined by X-ray diffraction (XRD) using Cu K $\alpha$  radiation ( $\lambda = 1.5406 \text{ \AA}$ ). Diffraction patterns were recorded over a  $2\theta$  range of  $5^\circ$  to  $80^\circ$  at a scanning rate of  $5^\circ \text{ min}^{-1}$ . Microstructural features were visualized using a Hitachi SU-4800 scanning electron microscope (SEM). To obtain more precise structural information and perform elemental distribution analysis, transmission electron microscopy (TEM) analysis was conducted utilizing a JEM-2100F microscope that was fitted with an X-Max80T energy-dispersive spectroscopy (EDS) detector. Thermal behavior was assessed via thermogravimetric analysis (TGA) on an SDT650 instrument coupled with a DSC300 module under a nitrogen environment. To characterize the textural properties of the sample (such as specific surface area and pore size distribution), we employed an ASAP 2460 analyzer to conduct low-temperature nitrogen adsorption experiments based on the BET theoretical method. Additionally, the Raman spectra of the samples were acquired using a HORIBA LabRAM HR Evolution spectrometer, and their

---

surface chemical states were analyzed via X-ray photoelectron spectroscopy (XPS) performed on a Thermo Fisher ESCALAB 250Xi system.

### Electrochemical Measurements.

The electrochemical properties of the test material were evaluated using a CR2032 button cell. The active material, conductive carbon black, and polyvinylidene fluoride (PVDF) binder were combined in a mass ratio of 70:20:10. An adequate volume of N-methyl-2-pyrrolidone (NMP) was introduced, and the mixture was thoroughly ground to form a homogeneous slurry. This paste was applied to a stainless steel mesh current collector. The electrode was dried in a vacuum oven at 60°C for 12 h. Zinc foil served as the anode, with filter paper and 3 M ZnSO<sub>4</sub> acting as the cathode, separator, and electrolyte, respectively. The cathode material was loaded at a mass loading of 1.0-1.5 mg cm<sup>-2</sup>. Subsequently, the cell was tested for rate performance, cycling stability, self-discharge, and GITT using a Blue Electrode System (CT3002A) within a voltage window of 0.2-1.6 V. Cyclic voltammetry (CV) and electrochemical impedance spectroscopy (EIS) were performed on the material using an electrochemical workstation (CHI 660E).

### Figure

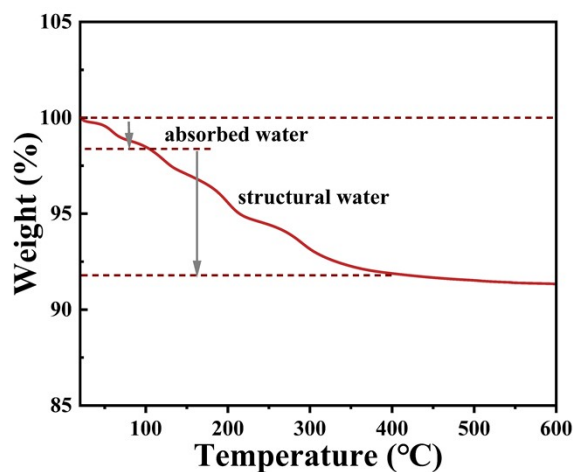

Figure S1. TGA curve of MVOH.

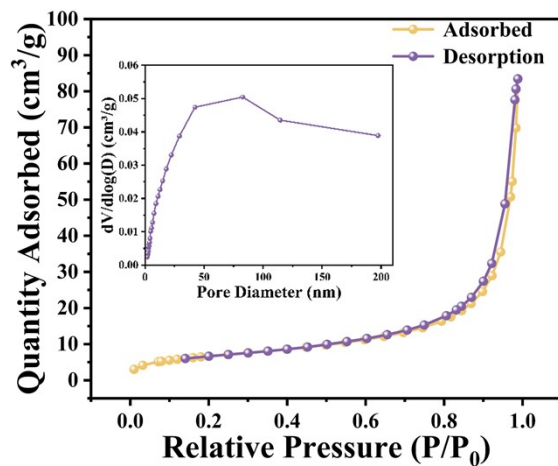

Figure S2. Nitrogen adsorption-desorption isotherms and pore size distribution of VOH.

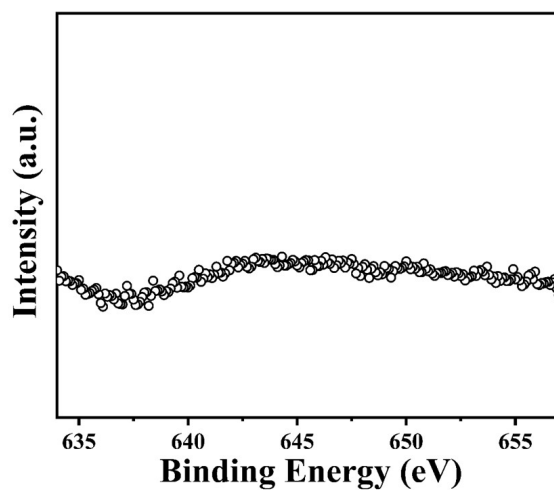

Figure S3. Mn 2p XPS spectrum of VOH.

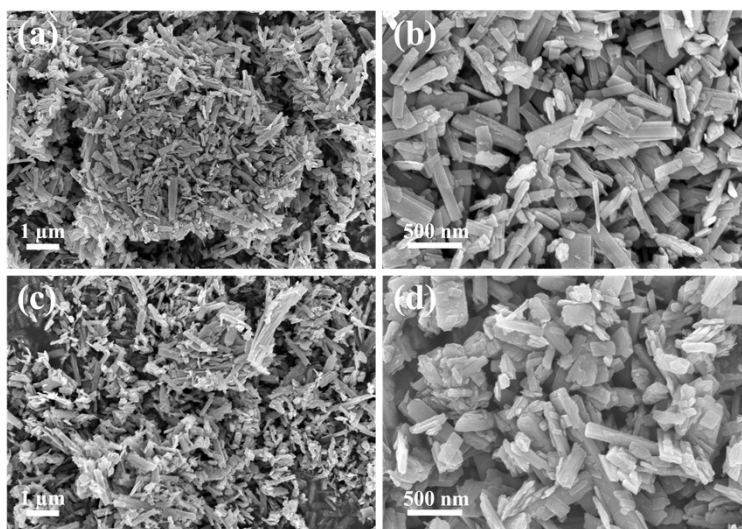

Figure S4. (a, b) SEM images of MVOH-1; (c, d) SEM images of MVOH-3.

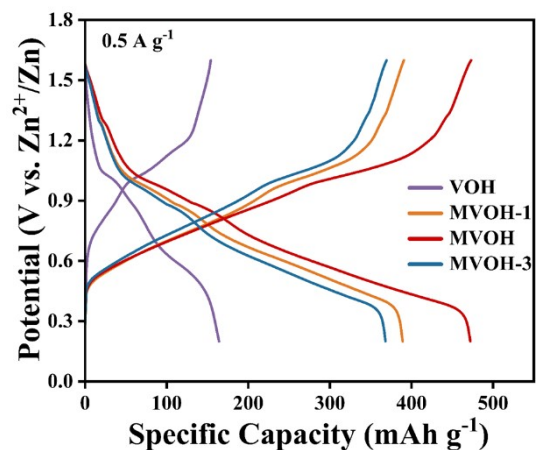

Figure S5. GCD curves for different materials at the same current density ( $0.5 \text{ A g}^{-1}$ ).

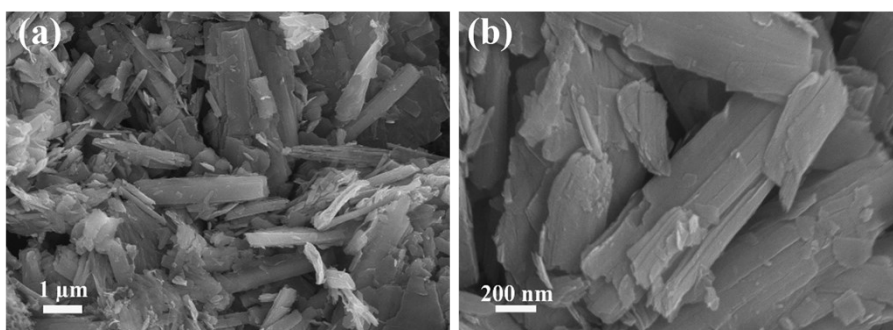

Figure S6. SEM image of MVOH after 3000 cycles at  $5 \text{ A g}^{-1}$ .

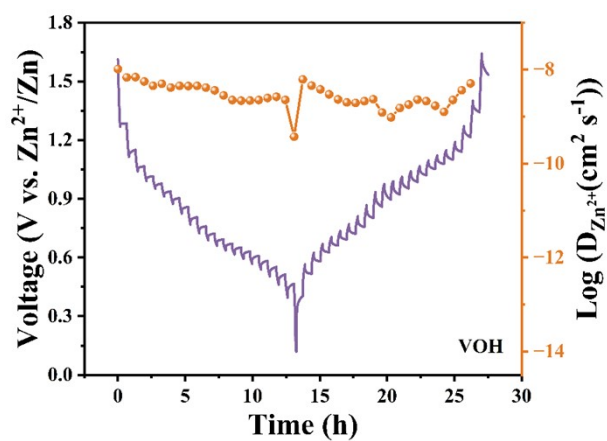

Figure S7. GITT curves and diffusion coefficients of VOH.

## Table

Table S1. Element Content of the Sample

| elements | sample element content <i>Wt</i> (%) |
|----------|--------------------------------------|
| V        | 46.41                                |
| Mn       | 4.29                                 |

Table S2. Related References

| Materials                                     | Current density<br>(A g <sup>-1</sup> ) | Capacity (mAh g <sup>-1</sup> ) /<br>Number | Capacity<br>retention rate | Ref.      |
|-----------------------------------------------|-----------------------------------------|---------------------------------------------|----------------------------|-----------|
| MVOH                                          | 5                                       | 250.1 (3000)                                | 80.1%                      | This work |
| VMO/rGO                                       | 5                                       | 228.3 (3000)                                | 42%                        | 1         |
| V <sub>2</sub> O <sub>3</sub> @C              | 5                                       | 207 (2000)                                  | 78%                        | 2         |
| CNVO                                          | 5                                       | 183 (1300)                                  | 91%                        | 3         |
| NVO/PDAN                                      | 5                                       | 178.6 (2000)                                | 77%                        | 4         |
| KVOH                                          | 1                                       | 290 (800)                                   | 76.7%                      | 5         |
| Mn <sub>2</sub> V <sub>2</sub> O <sub>7</sub> | 2                                       | 150 (2500)                                  | /                          | 6         |
| HVO/GO-CNT                                    | 1                                       | 251.9 (1000)                                | 82.6%                      | 7         |
| 5-MoVOH                                       | 2                                       | 216.2 (1000)                                | 95%                        | 8         |
| BNVO-3                                        | 5                                       | 109.8 (1500)                                | 92.9%                      | 9         |

## Reference

1. Y. X. Luo, Q. Kuang, Y. B. Li, J. X. Zhan, Y. H. Cheng, Q. H. Fan, Y. Z. Dong and Y. M. Zhao, Decoupling Zn<sup>2+</sup>/H<sup>+</sup> co-insertion in VOMo<sub>4</sub>O/rGO heterostructure for dendrite-free symmetric zinc-ion batteries, *Chem Eng J*, 2026, 532, 174457.
2. D. Q. Wang, W. H. Liang, X. D. He, Y. Yang, S. Wang, J. Li, J. C. Wang and H. L. Jin, V<sub>2</sub>O<sub>3</sub>@C Microspheres as the High-Performance Cathode Materials for Advanced Aqueous Zinc-Ion Storage, *ACS Appl Mater Inter*, 2023, 15, 20876-20884.

3. S. Yao, Y. G. Sun, Z. Cui and G. J. He, Ca doping  $\text{NH}_4\text{V}_4\text{O}_{10}$  with enhanced zinc-ion storage ability and structural stability for high performance aqueous zinc-ion batteries, *Rare Metals*, 2025, 44, 6081-6091.
4. Y. Xu, X. Z. Tang, X. C. Xie, N. Wang and W. C. Hu, Construction of a hybrid layered composite with intercalated polymer as cathode for aqueous zinc ion batteries, *J Colloid Interf Sci*, 2025, 692, 137514.
5. J. A. Chen, X. J. Hou, X. L. Wang, C. X. Wang, J. W. Wen, Y. J. Bu, G. Y. Huang, T. T. Cao and S. M. Xu, Bi-intercalated vanadium pentoxide synthesized hydrogen peroxide-induced phase transition for highly stable cathode in aqueous zinc ion batteries, *J Mater Chem A*, 2024, 12, 11322-11331.
6. F. F. Mao, T. Yu, Y. W. Li, S. Q. Sheng, Q. Zhang and J. H. Yao, Single-crystalline  $\text{Mn}_2\text{V}_2\text{O}_7$  with high operating voltage and energy density as a cathode material for aqueous zinc-ion batteries, *J Energy Storage*, 2025, 109, 115241.
7. D. W. Rao, W. W. Zhang, B. C. Cheng, Y. Wang, C. S. F. Lei, Q. Y. An, M. Huang and L. Q. Mai,  $\text{V}_2\text{O}_5 \cdot n\text{H}_2\text{O}$  and Graphene Oxide/CNTs Composite Film as Binder-Free Cathode for Aqueous Zinc-Ion Batteries, *Batteries Supercaps*, 2024, 7, 2400046.
8. G. F. Shi, P. Zhao, P. Gao, Y. Y. Xing and B. X. Shen, Employing the optimized pre-intercalation strategy to design functional Mo pre-intercalated hydrated vanadium oxide for aqueous zinc-ion batteries, *J Energy Storage*, 2024, 78, 110057.
9. Z. H. Deng, W. Shao, H. Y. Wang, Y. B. Wang, J. Sheng, H. C. Mu, C. Lian and W. J. Wu, Augmenting specific capacitance of ammonium vanadate cathode in aqueous zinc-ion batteries via barium doping directed by glutamic acid, *J Power Sources*, 2024, 614, 234976.
